# Supplementary material for: Serine phosphorylation regulates the P-type potassium pump KdpFABC
Source: eLife journal article supplement (doi:10.7554/elife.55480), 2020-09-21
Supplement: supp [file elife_poa_e55480_Figure_3_figure_supplement_1.pdf › elife_poa_e55480_Figure_3_figure_supplement_1.pdf]

A

E.SAITGE162pSAPVIRE.S.

Observed m/z: 705.3376, Experimental mass: 1408.6606, Calculated mass: 1408.6599

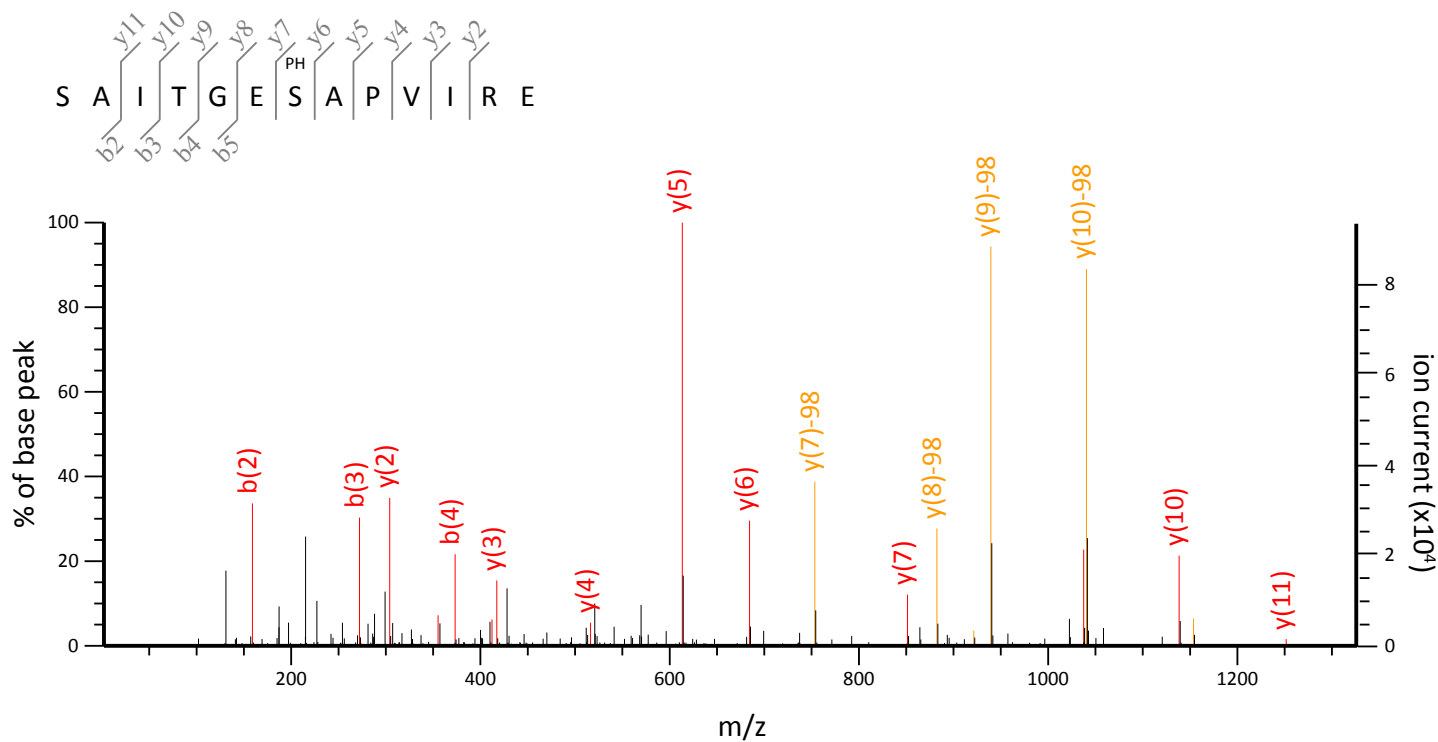

B

| #  | b         | b <sup>++</sup> | b <sup>+</sup> | b <sup>+++</sup> | b <sup>0</sup> | b <sup>0++</sup> | Seq | y         | y <sup>++</sup> | y <sup>+</sup> | y <sup>+++</sup> | y <sup>0</sup> | y <sup>0++</sup> | #  |
|----|-----------|-----------------|----------------|------------------|----------------|------------------|-----|-----------|-----------------|----------------|------------------|----------------|------------------|----|
| 1  | 88.0393   | 44.5233         |                |                  | 70.0287        | 35.5180          | S   |           |                 |                |                  |                |                  | 13 |
| 2  | 159.0764  | 80.0418         |                |                  | 141.0659       | 71.0366          | A   | 1224.6583 | 612.8328        | 1207.6317      | 604.3195         | 1206.6477      | 603.8275         | 12 |
| 3  | 272.1605  | 136.5839        |                |                  | 254.1499       | 127.5786         | I   | 1153.6212 | 577.3142        | 1136.5946      | 568.8009         | 1135.6106      | 568.3089         | 11 |
| 4  | 373.2082  | 187.1077        |                |                  | 355.1976       | 178.1024         | T   | 1040.5371 | 520.7722        | 1023.5106      | 512.2589         | 1022.5265      | 511.7669         | 10 |
| 5  | 430.2296  | 215.6185        |                |                  | 412.2191       | 206.6132         | G   | 939.4894  | 470.2483        | 922.4629       | 461.7351         | 921.4789       | 461.2431         | 9  |
| 6  | 559.2722  | 280.1397        |                |                  | 541.2617       | 271.1345         | E   | 882.4680  | 441.7376        | 865.4414       | 433.2243         | 864.4574       | 432.7323         | 8  |
| 7  | 628.2937  | 314.6505        |                |                  | 610.2831       | 305.6452         | S   | 753.4254  | 377.2163        | 736.3988       | 368.7030         | 735.4148       | 368.2110         | 7  |
| 8  | 699.3308  | 350.1690        |                |                  | 681.3202       | 341.1638         | A   | 684.4039  | 342.7056        | 667.3774       | 334.1923         | 666.3933       | 333.7003         | 6  |
| 9  | 796.3836  | 398.6954        |                |                  | 778.3730       | 389.6901         | P   | 613.3668  | 307.1870        | 596.3402       | 298.6738         | 595.3562       | 298.1817         | 5  |
| 10 | 895.4520  | 448.2296        |                |                  | 877.4414       | 439.2243         | V   | 516.3140  | 258.6606        | 499.2875       | 250.1474         | 498.3035       | 249.6554         | 4  |
| 11 | 1008.5360 | 504.7717        |                |                  | 990.5255       | 495.7664         | I   | 417.2456  | 209.1264        | 400.2191       | 200.6132         | 399.2350       | 200.1212         | 3  |
| 12 | 1164.6371 | 582.8222        | 1147.6106      | 574.3089         | 1146.6266      | 573.8169         | R   | 304.1615  | 152.5844        | 287.1350       | 144.0711         | 286.1510       | 143.5791         | 2  |
| 13 |           |                 |                |                  |                |                  | E   | 148.0604  | 74.5339         |                |                  | 130.0499       | 65.5286          | 1  |

Figure 3 - figure supplement 1
