# Supplementary figures and images for: Serine phosphorylation regulates the P-type potassium pump KdpFABC
Source: eLife journal article supplement (doi:10.7554/elife.55480), 2020-09-21

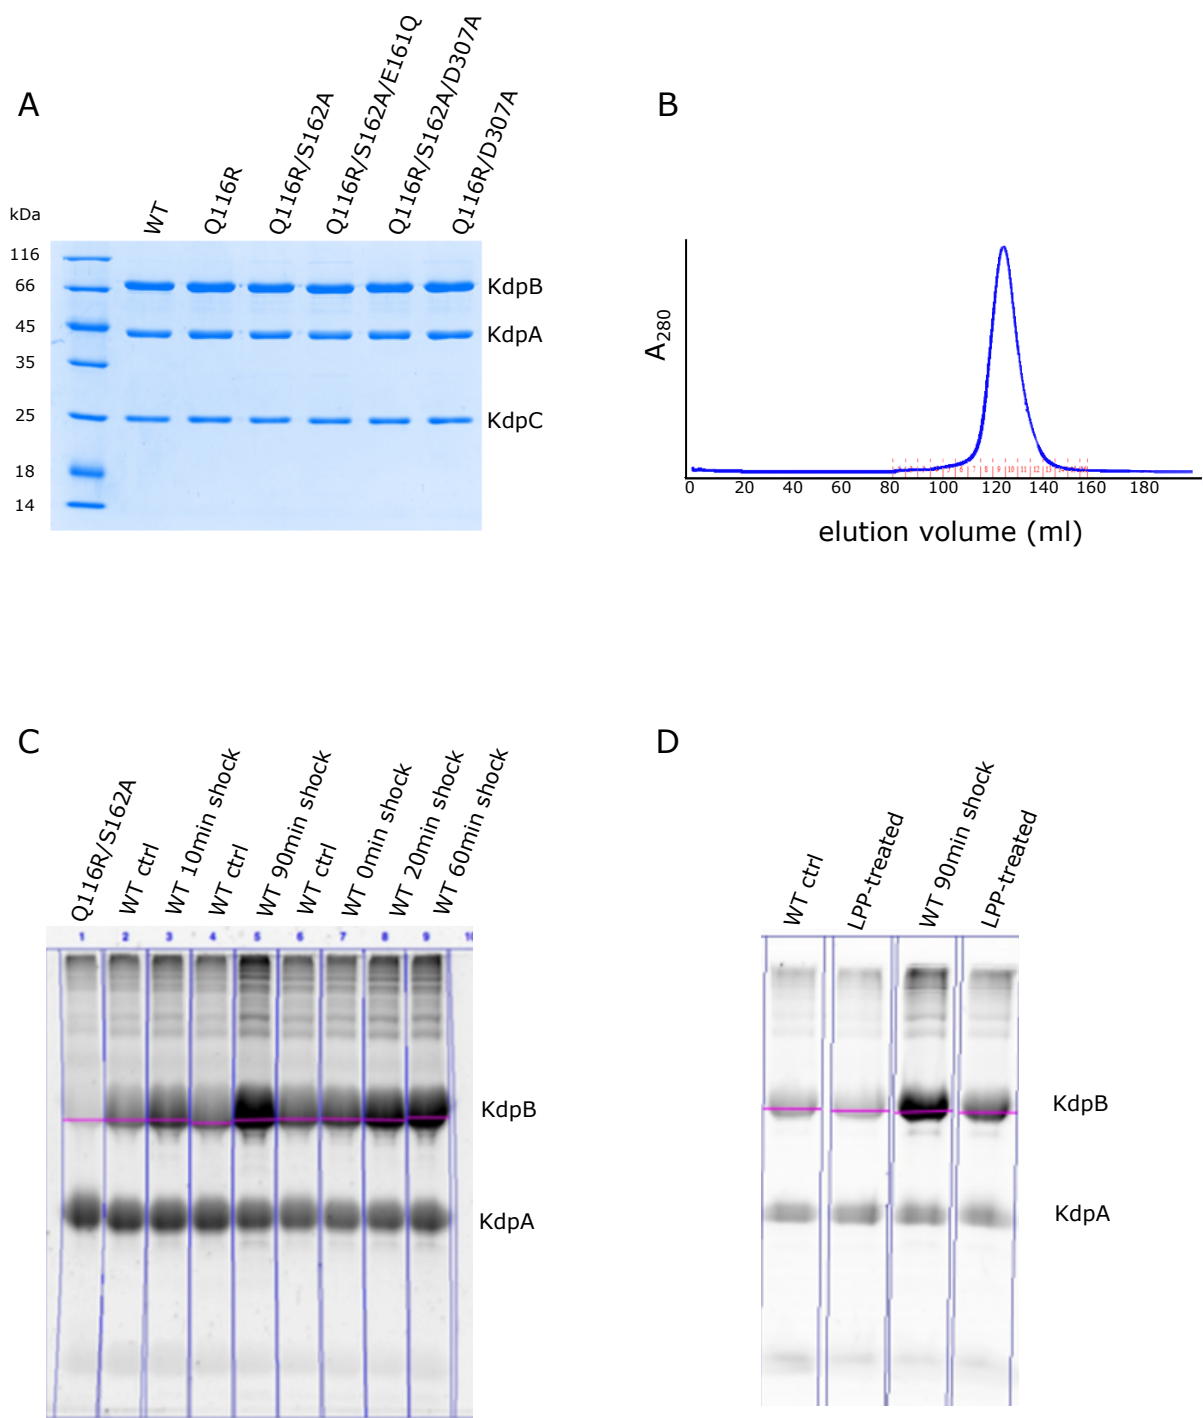

Figure 4 - figure supplement 1

Supplement: supp [file elife_poa_e55480_Figure_4_figure_supplement_1.pdf › elife_poa_e55480_Figure_4_figure_supplement_1.pdf]

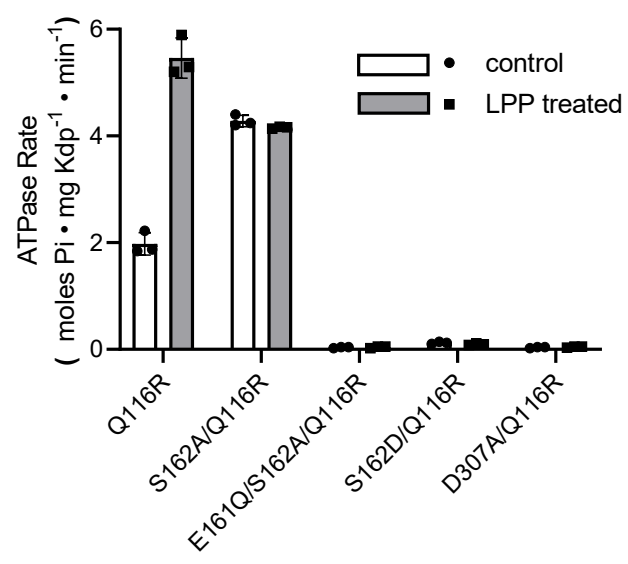

Figure 5 - figure supplement 1

Supplement: supp [file elife_poa_e55480_Figure_5_figure_supplement_1.pdf › elife_poa_e55480_Figure_5_figure_supplement_1.pdf]

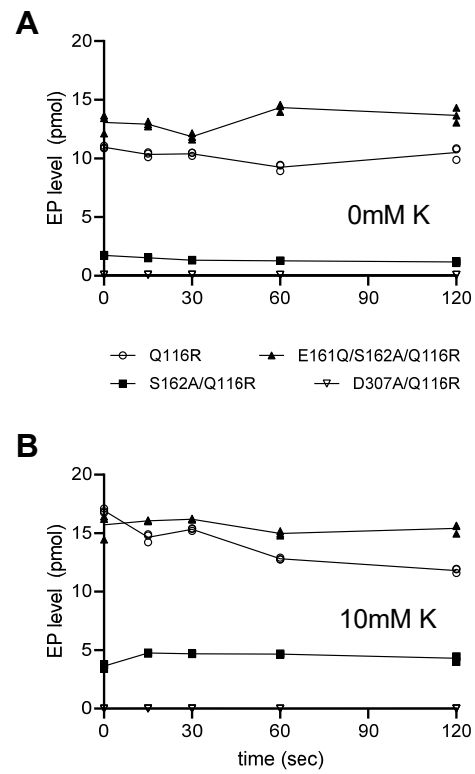

Figure 5 - figure supplement 2

Supplement: supp [file elife_poa_e55480_Figure_5_figure_supplement_2.pdf › elife_poa_e55480_Figure_5_figure_supplement_2.pdf]

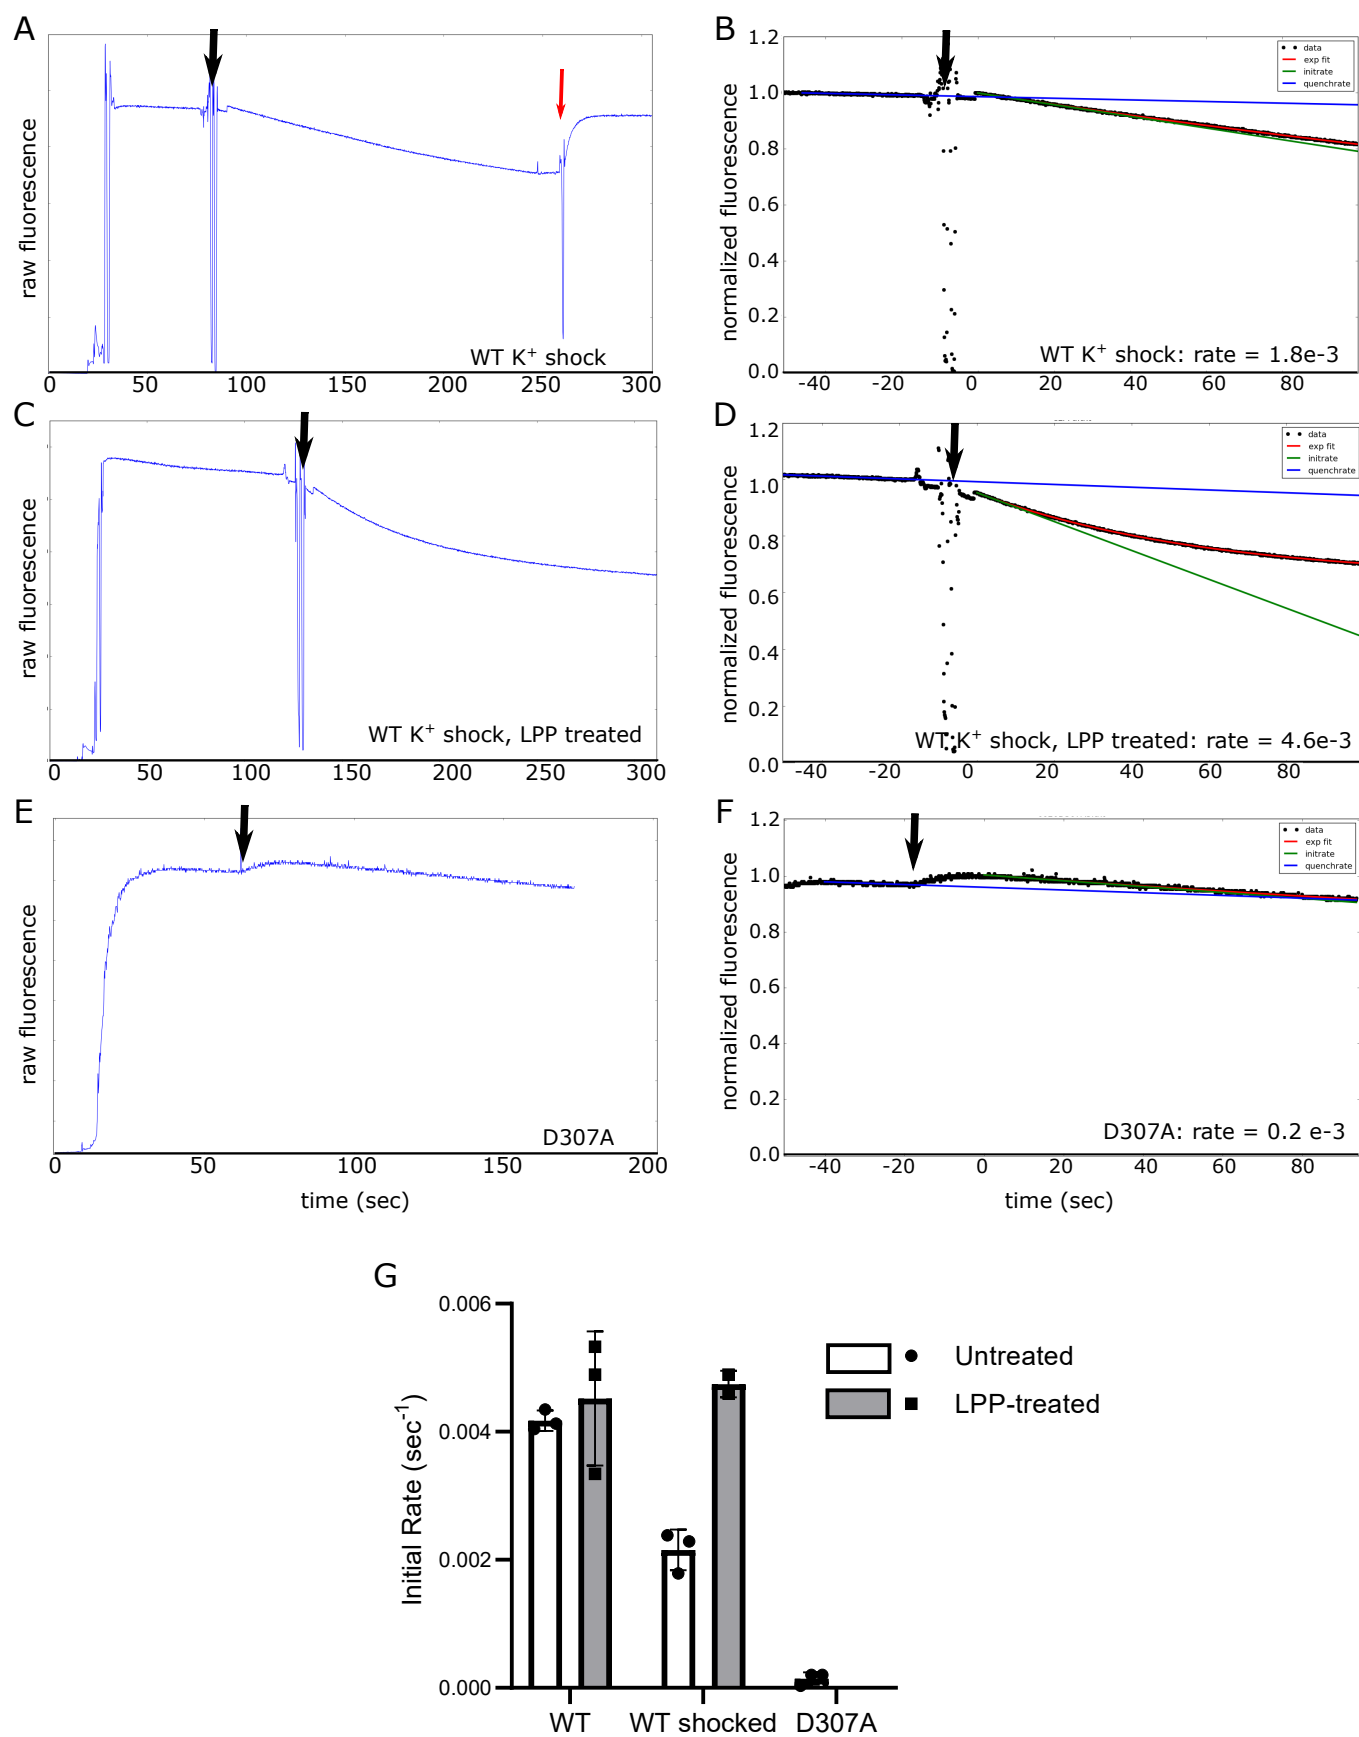

Figure 6 - figure supplement 1

Supplement: supp [file elife_poa_e55480_Figure_6_figure_supplement_1.pdf › elife_poa_e55480_Figure_6_figure_supplement_1.pdf]

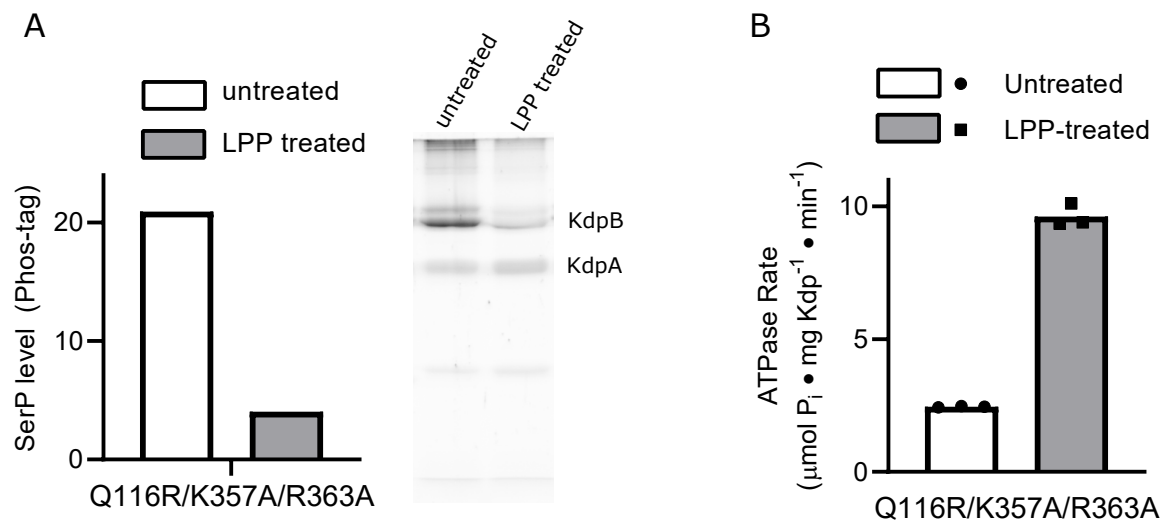

Figure 6 - figure supplement 2

Supplement: supp [file elife_poa_e55480_Figure_6_figure_supplement_2.pdf › elife_poa_e55480_Figure_6_figure_supplement_2.pdf]
